# Supplementary material
Source: Springer Nature journal article supplement (https://www.springermedizin.de/resource/supplementary/13054_2011_9391_MOESM2_ESM.pdf/9706096)

**PD-1**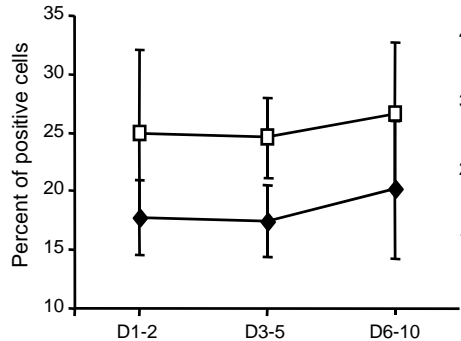**PD-L1**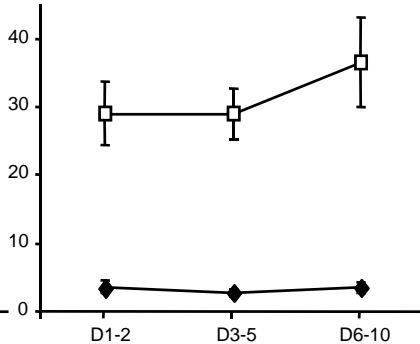**PD-L2**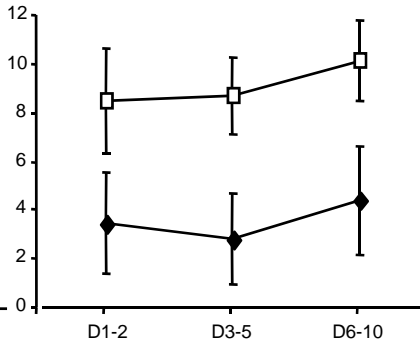

Supplement: MOESM2 [file 9706096]
